# Supplementary material
Source: PubMed Central journal article supplement (PMC4463210)
Supplement: JCI80445sd.pdf [file JCI80445sd.pdf]

**Supplemental Figure 1**  
**Chauvin J et al.**

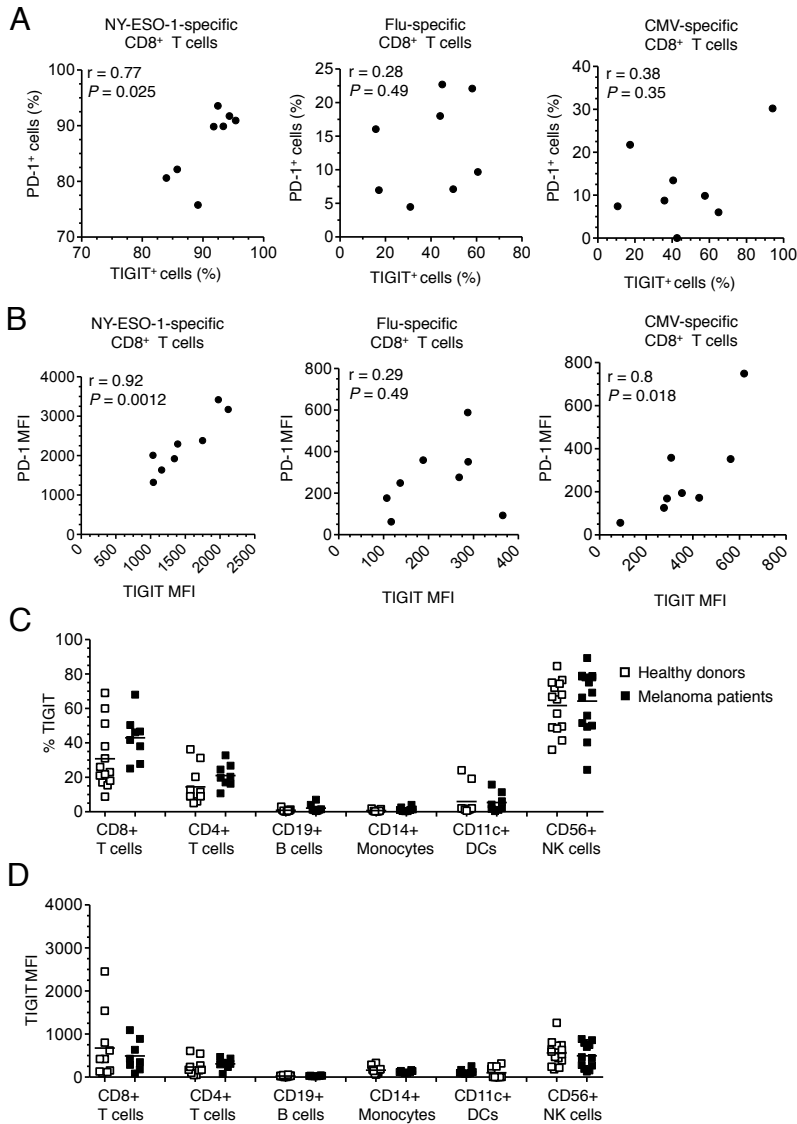

**Supplemental Figure 1. TIGIT is upregulated on T cells and NK cells in melanoma patients and TIGIT expression is positively correlated with PD-1 expression on NY-ESO-1 CD8<sup>+</sup> T cells.** (A and B), Pooled data (n = 8) from the analysis of PBMCs of patients with advanced melanoma, correlating TIGIT and PD-1 expression in percentage (A) and in MFI (B) by NY-ESO-1-, Flu- and CMV-specific CD8<sup>+</sup> T cells of patients; *P* values were obtained by Pearson tests. (C and D) Pooled data showing the frequency (C) and MFI (D) of TIGIT expression by different subsets of PBMCs from healthy donors (n = 13; NK cells: n = 14) and melanoma patients (n = 8; NK cells: n = 15). Data shown are representative of three independent experiments.

**Supplemental Figure 2**  
**Chauvin J et al.**

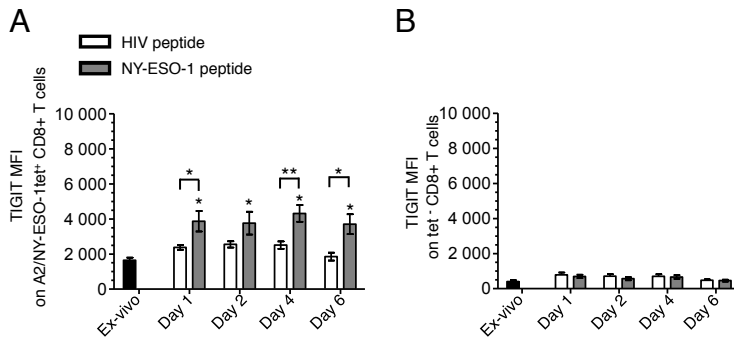

**Supplemental Figure 2. TIGIT is upregulated on NY-ESO-1–specific CD8<sup>+</sup> T cells upon stimulation with cognate antigen. (A and B)** Pooled data (n = 6) of the expression of TIGIT in MFI on A2/NY-ESO-1 157-165 tet<sup>+</sup> CD8<sup>+</sup> T cells **(A)** and tet<sup>+</sup> CD8<sup>+</sup> T cells **(B)** from PBMCs of melanoma patients at different time-points of a 6-d IVS in presence of cognate (NY-ESO-1 157-165) or irrelevant (HIV-pol 476-785) peptide. Data shown are from two independent experiments. Statistics are paired t-tests with \*,  $P < 0.05$ ; \*\*,  $P < 0.01$ . Stars above bars indicate a significant difference of the time point compared to ex vivo. Stars above brackets indicate a significant difference between two time-points.

**Supplemental Figure 3**  
**Chauvin J et al.**

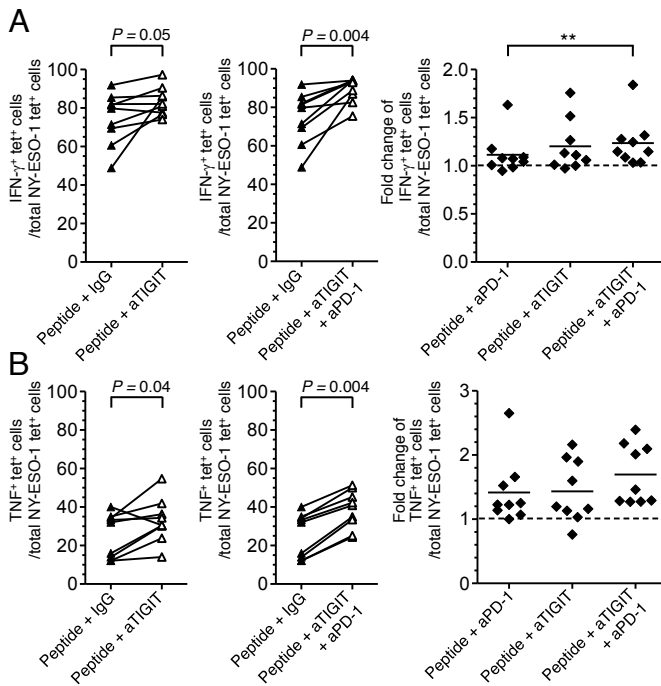

**Supplemental Figure 3. TIGIT adds to PD-1 blockade to increase cytokine production by NY-ESO-1–specific CD8+ T cells.** PBMCs of melanoma patients were incubated for 6 d in vitro in presence of NY-ESO-1 157-165 peptide and blocking mAbs against TIGIT (aTIGIT) and/or PD-1 (aPD-1) or isotype control mAbs (IgG) before evaluating intracellular cytokine production. **(A and B)** Pooled data ( $n = 9$ ) showing the frequency among NY-ESO-1–specific CD8+ T cells and fold change of IFN- $\gamma$ – **(A)** and TNF– **(B)** producing A2/NY-ESO-1 157-165 tet<sup>+</sup> CD8+ T cells according to indicated blocking mAbs treatment.  $P$  values were obtained by paired t tests and a Friedman test followed by Dunn’s multiple tests with: \*\*,  $P < 0.01$ . Data are from two independent experiments performed in duplicates.

**Supplemental Figure 4**  
**Chauvin J et al.**

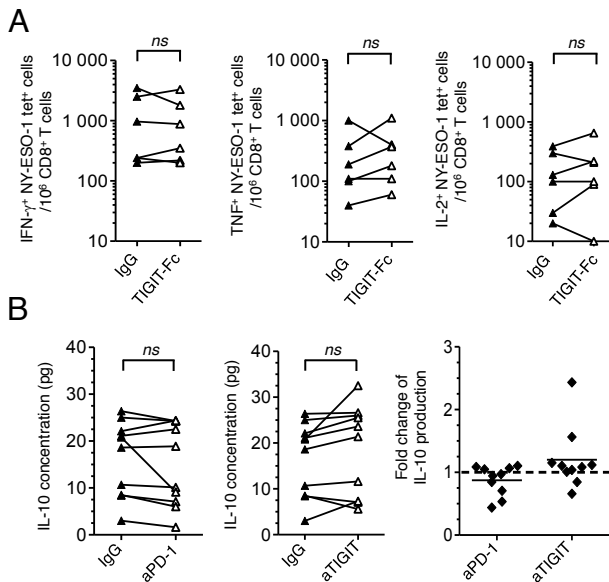

**Supplemental Figure 4. TIGIT blockade has no effect on IL-10 production by PBMCs and the binding of TIGIT-Fc to its ligands has no effect on cytokine production by TA-specific CD8+ T cells.** PBMCs of melanoma patients were incubated in vitro for 6 d with NY-ESO-1 157-165 peptide and blocking mAbs against PD-1 (aPD-1), TIGIT (aTIGIT), TIGIT-Fc or isotype control mAbs (IgG) before evaluating intracellular cytokine production of A2/NY-ESO-1 157-165 tet<sup>+</sup> CD8<sup>+</sup> T cells in response to cognate peptide. **(A)** Pooled data (n = 6) showing the frequency among CD8<sup>+</sup> T cells of IFN- $\gamma$ -, TNF- and IL-2-producing NY-ESO-1 157-165 tet<sup>+</sup> CD8<sup>+</sup> T cells from melanoma patients after incubation with TIGIT-Fc fusion protein. **(B)** Pooled data (n = 10) of the IL-10 concentration (pg) and fold change of IL-10 concentration in the supernatant of cultures after PD-1 blockade or TIGIT blockade. Paired t-tests were used to calculate *P* values; *ns*, non significant. Data are from two independent experiments performed in duplicates.

**Supplemental Figure 5**  
**Chauvin J et al.**

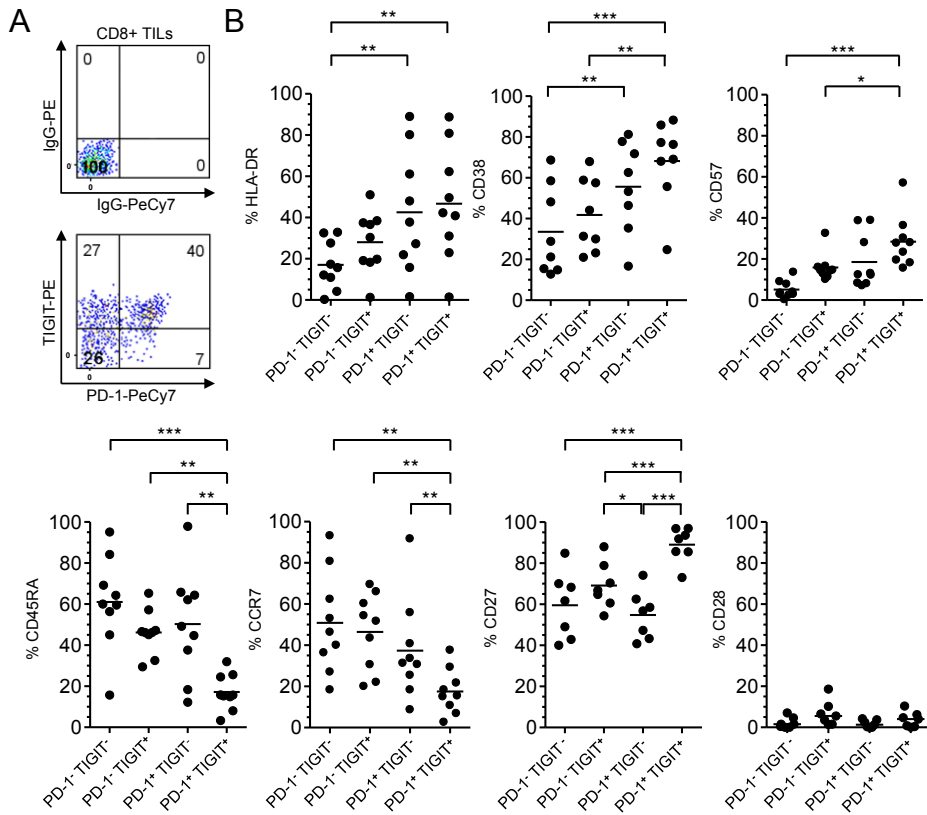

**Supplemental Figure 5. TIGIT<sup>+</sup>PD-1<sup>+</sup> CD8<sup>+</sup> TILs exhibit an effector memory and activated phenotype.** (A) Representative flow cytometry analysis of TIGIT and PD-1 co-expression *ex vivo* by one CD8<sup>+</sup> TILs isolated from metastatic melanoma. (B) Pooled data of the frequencies of HLA-DR, CD38 and CD57 CD45RA, CCR7, CD27 and CD28 *ex vivo* expression within the CD8<sup>+</sup> TILs of metastatic melanomas (n = 9), and according to PD-1 and TIGIT expression. *P* values were obtained by a Friedman test followed by Dunn's multiple tests (top right panel) and by repeated-measures ANOVA tests followed by Tukey's multiple comparison tests (all other panels) with: \*, *P* < 0.05; \*\*, *P* < 0.01; \*\*\*, *P* < 0.001. Data are representative of two independent experiments.

**Supplemental Figure 6**  
**Chauvin J et al.**

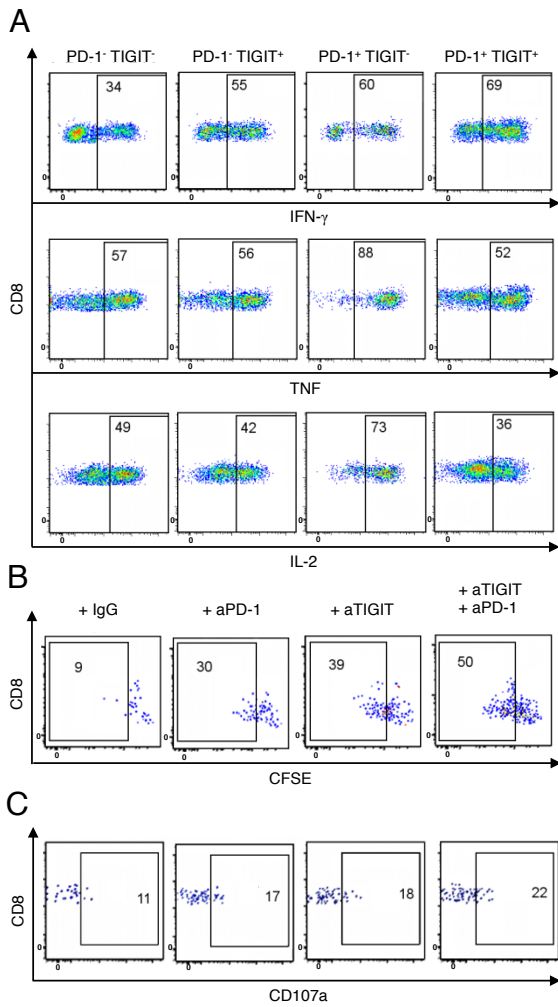

**Supplemental Figure 6. TIGIT blockade adds to PD-1 blockade to increase the frequencies of proliferating and degranulating TILs. (A)**

Representative dot plots of CD8+ TILs isolated from one metastatic melanoma showing IFN- $\gamma$ -, TNF- and IL-2- production according to PD-1 and TIGIT expression after stimulation by PMA and ionomycin. **(B and C)**

Representative flow cytometry analysis of the CFSE dilution **(B)** and CD107a expression **(C)** of CD8+ TILs after 5 d incubation with autologous non-CD3 cells isolated from metastatic melanoma, anti-CD3 mAbs and in the presence of blocking mAbs against PD-1 (aPD-1) and/or TIGIT (aTIGIT) or isotype control mAbs (IgG). Data are representative of two independent experiments.
